# Supplementary material for: Identification of Novel Glycans in the Mucus Layer of Shark and Skate Skin
Source: Int J Mol Sci. 2023 Sep 20;24(18):14331. doi: 10.3390/ijms241814331 (PMC10532229; doi:10.3390/ijms241814331)
Supplement: Supplementary file 1 [file ijms-24-14331-s001.zip › Supplementary File S1.xlsx]

## Sheet: Spinydogfish
221208/ Project 4511: Fishskin O-glycans and N-glycans extracted from spiny dogfish
Tubes were pooled to obtain sufficient amounts
Glycans were released from the proteins and analyzed with liquid chromatography-mass spectrometry in the negative ion mode
One analysis consisting of glycans from tubes 32 and 33 ('S3') was empty and not reported here
			TUBE LABELS	Pooled tubes: 19,20,21,22,23,24			Pooled tubes: 19,20,21,22,23,24			Pooled tubes (S1,S2,S3,S4,S5,S6)				Pooled tubes: 24,25,26			Pooled tubes: 27,29			Pooled tubes: 34,35			Pooled tubes: 36,37			Pooled tubes: 31,38,39
			LC/MS rawfile name		TT221110_4511.raw			TT221205_Sa.raw			TT221205_Sb			TT221202_S1.raw			TT221202_S2.raw			TT221202_S4			TT221202_S5			TT221202_S6
Name	m/z	Sequence/composition1	Proposed glycan2	RT(min)3	Intensity (Xcalibur)4	% Rel. Abundance5	RT(min)	Intensity (Xcalibur)	% Rel. Abundance	RT(min)	Intensity (Xcalibur)	% Rel. Abundance	RT(min)	Intensity (Xcalibur)	% Rel. Abundance	RT(min)	Intensity (Xcalibur)	% Rel. Abundance	RT(min)	Intensity (Xcalibur)	% Rel. Abundance	RT(min)	Intensity (Xcalibur)	% Rel. Abundance	RT(min)	Intensity (Xcalibur)	% Rel. Abundance
384	384(1-)	Hex-HexNAcol	Gal(b1-3)GalNAcol	6.64	160932	1.13015	6.23	303108	2.09189	6.38	37826	1.29429		0	0		0	0		0	0		0	0		0	0
425	425(1-)	HexNAc-HexNAcol	HexNAc-GalNAcol	10.74	42635	0.299407	11.49	97426	0.672384	11.31	48452	1.65788		0	0		0	0		0	0		0	0	10.78	3909	0.239042
464	464(1-)	SO3-Hex-HexNAcol	SO3-Gal-GalNAcol	8.9	33945	0.238381	8.3	78402	0.54109	8.75	13750	0.470483		0	0		0	0		0	0		0	0	9.16	1116	0.0682453
530	530(1-)	deHex-Hex-HexNAcol	Fuc(a1-2)Gal(b1-3)GalNAcol	23.27	2536496	17.8127	27.49	1930174	13.3211	27.81	354687	12.1363	23.79	266528	35.8727	22.62	710171	20.7825	24.009	295171	22.219	24.71	244963	41.5958	24.84	270211	16.5239
587a	587(1-)	Hex-HexNAc-HexNAcol	Gal-HexNAc-GalNAcol	11.14	81700	0.573743	12.1	204966	1.41457	12.21	78055	2.6708		0	0		0	0			0		0	0		0	0
587b	587(1-)	Hex-(HexNAc-)HexNAcol	Gal(b1-3)[HexNAc(b1-6)]GalNAcol	11.44	355373	2.49563	12.52	811295	5.59914	12.7	257793	8.82088		0	0	11.19	135187	3.95612	11.42	25610	1.92779	11.46	26414	4.48521	11.7	31336	1.91625
675a	675(1-)	Hex-(NeuAc)HexNAcol	Gal(b1-3)[NeuAc(a2-6)]GalNAcol	11.19	18457	0.129615	11.97	33097	0.228418		0	0		0	0		0	0		0	0		0	0		0	0
675b	675(1-)	NeuAc-Hex-HexNAcol	NeuAc(a2-3)Gal(b1-3)GalNAcol	13.54	23425	0.164503	14.81	31854	0.21984		0	0		0	0		0	0		0	0		0	0		0	0
733a	733(1-)	deHex-Hex-HexNAc-HexNAcol	Fuc(a1-2)Gal(b1-)HexNAc-GalNAcol*	17.34	555513	3.90112	20.33	480936	3.31917	20.58	95252	3.25923		0	0	16.83	195027	5.70728	17.66	53028	3.99169	18.07	31253	5.3069	18.35	92905	5.6813
733b	733(1-)	deHex-Hex-[HexNAc-]HexNAcol	Fuc(a1-2)Gal(b1-3)[HexNAc(b1-6)]GalNAcol	23.76	1373736	9.64714	28.16	1056118	7.28878	28.4	184156	6.30125	24.53	72701	9.78503	23.18	513214	15.0187	24.74	166154	12.5073		0	0	25.49	121450	7.42688
733c	733(1-)	HexNAc + deHex-Hex-HexNAcol	HexNAc + Fuc(a1-2)Gal(b1-3)GalNAcol		0	0		0	0		0	0		0	0		0	0		0	0	0	0	0	26.86	172787	10.5662
749a	749(1-)	Hex-(Hex-HexNAc-)HexNAcol	Gal(b1-3)[Gal-GlcNAc(b1-6)]GalNAcol	14.61	112164	0.787678	16.84	194158	1.33998	17.02	24220	0.828734		0	0		0	0		0	0		0	0		0	0
749b	749(1-)	Hex-(Hex-HexNAc-)HexNAcol	Gal(b1-3)[Gal-GlcNAc(b1-6)]GalNAcol	15.17	474351	3.33116	17.53	889572	6.13937	17.71	261462	8.94643		0	0		0	0		0	0		0	0		0	0
790a	790(1-)	Hex (1) HexNAc (3)	HexNAc-HexNAc-HexNAc-Hexol**	12.74	20322	0.142712	14.17	34672	0.239288	14.27	22854	0.781994		0	0	12.41	29778	0.871425		0	0		0	0		0	0
790b	790(1-)	HexNAc-(Hex-)HexNAc-HexNAc	HexNAc-(Gal-)GalNAc(a1-3)GalNAcol*	14.45	326934	2.29591	16.49	455221	3.1417	16.63	96637	3.30662		0	0		0	0		0	0		0	0		0	0
895a	895(1-)	Hex-(deHex-Hex-3HexNAc-)HexNAcol	Gal(b1-3)[Fuc(a1-2)Gal(b1-3)GlcNAc(b1-6)]GalNAcol	16.3	689801	4.84416	18.9	1001162	6.9095	19.16	219980	7.52704		0	0		0	0	16.67	28033	2.11019	17	51830	8.80096	17.23	26523	1.62193
895b	895(1-)	Hex-(deHex-Hex-4HexNAc-)HexNAcol	Gal(b1-3)[Fuc(a1-2)Gal(b1-4)GlcNAc(b1-6)]GalNAcol	19.37	87778	0.616426	22.73	65189	0.449901	23.03	16579	0.567282		0	0		0	0		0	0		0	0		0	0
895c	895(1-)	deHex-Hex-(Hex-HexNAc-)HexNAcol	Fuc(a1-2)Gal(b1-3)[Gal(b1-4)GlcNAc(b1-6)]GalNAcol	24.07	1659771	11.6558	28.63	1725535	11.9088	28.85	346911	11.8702		0	0	23.43	159299	4.66173		0	0		0	0		0	0
936	936(1-)	HexNAc-(deHex-Hex-)HexNAc-HexNAc	HexNAc-(Fuc(a1-2)Gal-)GalNAc(a1-3)GalNAcol	16.67	509787	3.58001	19.56	710531	4.90372	19.71	95815	3.2785	16.98	71243	9.58879	16.29	228456	6.68555	17.13	80525	6.06153		0	0	17.76	87022	5.32154
952	952(1-)	Hex (2) HexNAc (3)	Galb1-3[HexNAc-Gal-GlcNAc(b1-6)]GalNAcol	16.51	46864	0.329105	19.41	65829	0.454318	19.62	23989	0.82083		0	0		0	0		0	0		0	0		0	0
993	993(1-)	Hex-[HexNAc-HexNAc-HexNAc-]HexNAcol	Gal(b1-3)[HexNAc(b1-4)HexNAc-HexNAc(b1-6)]GalNAcol**	13.59	102144	0.717312	15.31	217125	1.49848	15.45	62192	2.12802		0	0	13.26	105800	3.09614		0	0		0	0	14.15	7627	0.466404
1041a	1041(1-)	Hex-(deHex-Hex-(deHex-)HexNAc-)HexNAcol	Gal(b1-3)[Fuc(a1-2)Gal(b1-4)(Fuc-)GlcNAc(b1-6)]GalNAcol	14.29	82878	0.582015	16.21	96435	0.665545	16.41	22398	0.766391		0	0		0	0		0	0		0	0			0
1041b	1041(2-)	deHex-Hex-(deHex-Hex-3HexNAc-)HexNAcol	Fuc(a1-2)Gal(b1-3)[Fuc(a1-2)Gal(b1-3)GlcNAc(b1-6)]GalNAcol	24.38	2791425	19.6029	29.12	2059939	14.2166	29.47	341223	11.6756	25.2	332510	44.7534	23.81	772195	22.5975	25.45	380140	28.6151	26.2	171975	29.2021	26.27	417588	25.5362
1041c	1041(1-)	deHex-Hex-(deHex-Hex-4HexNAc-)HexNAcol	Fuc(a1-2)Gal(b1-3)[Fuc(a1-2)Gal(b1-4)GlcNAc(b1-6)]GalNAcol	25.92	145312	1.02046	31.85	138733	0.957464		0	0		0	0		0	0		0	0		0	0		0	0
1098a	1098(1-)	deHex(1) Hex (2) HexNAc (3)		13.33	17175	0.120612	15.12	33702	0.232594	15.29	7270	0.248757		0	0		0	0		0	0		0	0		0	0
1098b	1098(1-)	deHex(1) Hex (2) HexNAc (3)		17.79	36574	0.256843	21.07	40584	0.28009	21.39	11245	0.384769		0	0		0	0		0	0		0	0		0	0
1098c	1098(1-)	deHex(1) Hex (2) HexNAc (3)		19.17	191264	1.34316	22.93	156753	1.08183	23.22	18636	0.637667		0	0		0	0		0	0		0	0		0	0
1187	1187(1-)	deHex-Hex-(deHex-Hex-(deHex-)HexNAc-)HexNAcol	Fuc(a1-2)Gal(b1-3)[Fuc(a1-2)Gal(b1-)(Fuc-GlcNAc(b1-6)]GalNAcol	24.28	278138	1.95324	28.91	369438	2.54967	29.2	65780	2.25079		0	0	23.75	481364	14.0867	25.39	187433	14.109		0	0	26.13	169321	10.3543
1406a	1406(1-) 702.9(2-)	deHex(2) Hex (3) HexNAc (3)		16.62	159853	1.12258	19.7	193080	1.33254	19.85	59959	2.05161		0	0		0	0		0	0		0	0		0	0
1406b	1406(1-)	deHex(2) Hex (3) HexNAc (3)		24.74	297033	2.08593	29.7	109516	0.755823	30.09	25659	0.877972		0	0		0	0		0	0		0	0		0	0
1552	1552(1-), 775(2-)	deHex(3) Hex (2) HexNAc (1) +Hex-HexNAc-HexNAcol		25.25	640635	4.49889	30.66	589725	4.06998	31.09	62519	2.13921		0	0		0	0		0	0		0	0	27.57	97984	5.99189
749n	749(1-)	Hex-Hex-HexNAc-HexNAcol	Manα1-3/6Manβ1-4GlcNAcβ1-4GlcNAcol***	17.69	246404	1.73039	20.86	181915	1.25548	21.11	67231	2.30044		0	0	17.44	86672	2.53637	18.48	97281	7.32283	18.81	62478	10.609	19.04	117857	7.20716
1520n	760(2-)		GlcNAcβ1-2Manα1-3[GlcNAcβ1-2Manα1-6]Manβ1-4GlcNAcβ1-4GlcNAcol***	15.43	29438	0.20673	18.01	48735	0.336344		0	0		0	0		0	0	15.86	15086	1.1356		0	0	16.42	17641	1.07878
1933n	966(2-)		NeuAcα2-3Galβ1-4GlcNAcβ1-2Manα1-3[Galβ1-4GlcNAcβ1-2Manα1-6]Manβ1-4GlcNAcβ1-4GlcNAcol***	20.59	111576	0.783549	24.57	84713	0.584645		0	0		0	0		0	0		0	0		0	0			0
				SUM	14239833	100		14489638	100		2922530	100		742982	100		3417163	100		1328461	100		588913	100		1635277	100
			Total number of glycans			33			33			28			4			11			10			6			15
			Fuc-containing glycans (%)			84.644			74.2431			65.9726			100			89.5399			89.6138			84.9058			78.4579
			Glycans with terminal HexNAc (%)			19.7139			24.1342			27.096			19.3738			29.6279			21.6322			4.48521			27.0151
			SO3- containing glycans (%)			0.238381			0.54109			0.470483			0			0			0			0			0.0682453
			NeuAc containing glycans (%)			1.07767			1.0329			0			0			0			0			0			0
			Acidic(sum SO3+NeuAc) glycans (%)			1.31605			1.57399			0.470483			0			0			0			0			0.0682453
			N-glycans (%)			2.72066			2.17647			2.30044			0			2.53637			8.45843			10.609			8.28594
1 Sequence/composition is based upon interpretation of MS fragmentation spectra and comparision to published reference spectra
Hex, hexose; HexNAc, N-acetylhexosamine; deHex, fucose; NeuAc, N-acetylneuraminic acid; ; SO3, sulphate
2 Interpretation of glycan sequences are aided by studies of O- and N-glycans from mammalian system and from fish (zebrafish, Atlantic salmon, rainbow trout)
Assumptions and abbreviations: Gal, galactose; GalNAc, N-acetylgalactosamine; GlcNAc, N-acetylglucosamine; deoxyhexose, Fuc; SO3, sulfate; NeuAc, N-acetylneuraminic acid.
Branches linked to C-6 of the core GalNAc are highlighted in bold.
Glycans labelled with * are proposed to have core 5 (GalNAc-GalNAc) by resemblance to refspectra from Atlantic salmon, and lack of resemblance to human glycoforms from saliva
Glycans with three HexNAcs (labelled with **) linked to a reduced Hexol have not been observed in mammalian or fish before.
All glycans are of O-glycan type, except for the last three sequences (labelled with ***), which resemble N-glycans
3 Retention time (RT) of selected structure on LC;
4 Relative abundance compared to other glycans in the same sample. Note that ionization efficiency for individual glycans is not determined and may differ.
The intensity is area-under-the-curves (AUCs) of each glycan. The intensity was normalised to total AUC (summed AUCs of all glycans in a sample) and expressed as a percentage.

## Sheet: Catshark
221208/ Project 4511: Fishskin O-glycans and N-glycans extracted from catshark
Tubes were pooled to obtain sufficient amounts. Aliquots taken for proteomics
Glycans were released from the proteins and analyzed with liquid chromatography-mass spectrometry in the negative ion mode
			TUBE LABELS	Pooled tubes: 3,4,5,6,7,8,10,11,12,13,14,15,16,17
			LC/MS rawfile name		TT221205_Ca.raw
Name	m/z	Sequence/composition1	Proposed glycan2	RT(min)3	Intensity (Xcalibur)4
749a	749(1-)	Hex-(Hex-HexNAc-)HexNAcol	Gal(b1-3)[Gal-GlcNAc(b1-6)]GalNAcol	16.5	29103
749b	749(1-)	Hex-(Hex-HexNAc-)HexNAcol	Gal(b1-3)[Gal-GlcNAc(b1-6)]GalNAcol	17.7	129969
895d	895(1-)	Hex-(deHex-)HexNAc-Hex-HexNAcol	Gal-[Fuc(-)]GlcNAc-Gal-GalNAcol	16.3	689801
				SUM	848873
1 Sequence/composition is based upon interpretation of MS fragmentation spectra and comparision to published reference spectra
Hex, hexose; HexNAc, N-acetylhexosamine; deHex, fucose; NeuAc, N-acetylneuraminic acid; ; SO3, sulphate
2 Interpretation of glycan sequences are aided by studies of O- and N-glycans from mammalian system and from fish (zebrafish, Atlantic salmon, rainbow trout)
Assumptions and abbreviations: Gal, galactose; GalNAc, N-acetylgalactosamine; GlcNAc, N-acetylglucosamine; deoxyhexose, Fuc; SO3, sulfate; NeuAc, N-acetylneuraminic acid.
Branches linked to C-6 of the core GalNAc are highlighted in bold.
2 Retention time (RT) of selected structure on LC;
3 Relative abundance compared to other glycans in the same sample. Note that ionization efficiency for individual glycans is not determined and may differ.
The intensity is area-under-the-curves (AUCs) of each glycan. The intensity was normalised to total AUC (summed AUCs of all glycans in a sample) and expressed as a percentage.

## Sheet: Little skate
221208/ Project 4511: Fishskin O-glycans and N-glycans extracted from Little skate
Customer tubes were pooled to obtain sufficient amounts
Glycans were released from the proteins and analyzed with liquid chromatography-mass spectrometry in the negative ion mode
One analysis consisting of glycans from tubes 32 and 33 ('S3') was empty and not reported here
			TUBE LABELS		Pooled tubes:41,42			Pooled tubes: 43,44			Pooled samples L1 and L2
			LC/MS rawfile name		TT221202_L1.raw			TT221202_L2.raw			TT221205_L1.raw
Name	m/z	Sequence/composition1	Proposed glycan2	RT(min)3	Intensity (Xcalibur)4	% Rel. Abundance5	RT(min)	Intensity (Xcalibur)	% Rel. Abundance	RT(min)	Intensity (Xcalibur)	% Rel. Abundance
384	384(1-)	Hex-HexNAcol	Gal(b1-3)GalNAcol		0	0	5.75	321240	1.67968		0	0
464	464(1-)	SO3-Hex-HexNAcol	SO3-Gal-GalNAcol	9.46	725315	4.71336	8.61	1007748	5.26925	9.45	902082	6.04592
530	530(1-)	deHex-Hex-HexNAcol	Fuc(a1-2)Gal(b1-3)GalNAcol	22.95	5896332	38.3165	22.8	3792889	19.832	22.43	4049178	27.1383
587c	587(1-)	HexNAc-Hex-HexNAcol	HexNAc-Gal-GalNAcol	11.3	323515	2.10232	11.17	1530316	8.00162	11.23	685032	4.59121
610	610(1-)	deHex-(SO3-)Hex-HexNAcol	Fuc(a1-2)(SO3-)Gal(b1-)HexNAc-GalNAcol*	16.78	2020132	13.1275	16.12	3517354	18.3913	16.46	2146002	14.3829
675a	675(1-)	Hex-(NeuAc)HexNAcol	Gal(b1-3)[NeuAc(a2-6)]GalNAcol	11.61	57610	0.374371	11.05	122437	0.640191	11.36	91538	0.613504
733d	733(1-)	deHex-(HexNAc-)Hex-HexNAcol	Fuc(a1-2)(HexNAc-)Gal(b1-3)GalNAcol	24.71	4327650	28.1226	24.48	6273835	32.8042	24.05	5016752	33.6232
813	813(1-)	deHex-(SO3-)Hex-[HexNAc-]HexNAcol	Fuc-(SO3-)Gal-[HexNAc(b1-6)]GalNAcol	18.6	249175	1.61923	17.94	47273	0.247178	18.2	122648	0.822009
821	821(-)	deHex-Hex-[NeuAc-]HexNAcol	Fuc-Gal-[NeuAc(b2-6)]GalNAcol	25.47	1078007	7.00528	24.6	993512	5.19481	24.9	847799	5.6821
878	878(1-)	NeuAc-Hex-[HexNAc-]HexNAcol	NeuAc-Gal(b1-3)[HexNAc(b1-6]GalNAcol*	14.32	106634	0.692946	13.8	396590	2.07366	14.04	227075	1.5219						324
901	901(1-)	deHex-(SO3-)Hex-[NeuAc-]HexNAcol	Fuc-(SO3-)Gal-[NeuAc(a2-6)]GalNAcol	18.92	148613	0.965741	17.68	577249	3.01828	18.48	256727	1.72063
1024	1024(1-)	HexNAc-(SO3-)Hex-[NeuAc-]HexNAcol	HexNAc-(SO3-)Gal-[NeuAc(a2-6)]GalNAcol	27.11	245587	1.59591	26.23	702058	3.67088	26.43	413423	2.77084
1121	1121(1-)	deHex-Hex-[deHex-(SO3-)Hex-HexNAc-6]HexNAcol	Fuc-Gal(b1-3)[Fuc-(SO3-)Gal-GlcNAc(b1-6]GalNAcol	27.04	209923	1.36416	26.17	163824	0.856592	26.29	162260	1.0875
				SUM	15388493	100		19125085	100		14920516	100
			Total number of glycans			12			13			12
			Fuc-containing glycans (%)			90.5211			80.3444			84.4566
			Glycans with terminal HexNAc (%)			34.133			46.7976			43.3291
			SO3- containing glycans (%)			10.2584			13.0622			12.4469
			NeuAc containing glycans (%)			3.62897			9.40301			6.62687
			Acidic(sum SO3+NeuAc) glycans (%)			13.8874			22.4652			19.0738
			N-glycans (%)			0			0			0
1 Sequence/composition is based upon interpretation of MS fragmentation spectra and comparision to published reference spectra
Hex, hexose; HexNAc, N-acetylhexosamine; deHex, fucose; NeuAc, N-acetylneuraminic acid; ; SO3, sulphate
2 Interpretation of glycan sequences are aided by studies of O- and N-glycans from mammalian system and from fish (zebrafish, Atlantic salmon, rainbow trout)
Assumptions and abbreviations: Gal, galactose; GalNAc, N-acetylgalactosamine; GlcNAc, N-acetylglucosamine; deoxyhexose, Fuc; SO3, sulfate; NeuAc, N-acetylneuraminic acid.
Branches linked to C-6 of the core GalNAc are highlighted in bold.
Glycans labelled with * are proposed to have core 5 (GalNAc-GalNAc) by resemblance to refspectra from Atlantic salmon, and lack of reseblance to human glycoforms (Human saliva)
Glycans with three HexNAcs (labelled with **) have not been observed in mammalian or fish before.
All glycans are of O-glycan type, except for the last three sequences (labelled with ***), which resemble N-glycans
2 Retention time (RT) of selected structure on LC;
3 Relative abundance compared to other glycans in the same sample. Note that ionization efficiency for individual glycans is not determined and may differ.
The intensity is area-under-the-curves (AUCs) of each glycan. The intensity was normalised to total AUC (summed AUCs of all glycans in a sample) and expressed as a percentage.
